# Supplementary material for: The Efficacy of Proclarix to Select Appropriate Candidates for Magnetic Resonance Imaging and Derived Prostate Biopsies in Men with Suspected Prostate Cancer
Source: PubMed Central journal article supplement — World J Mens Health. 2021 Dec 27;40(2):270–9. doi: 10.5534/wjmh.210117 (PMC8987145; doi:10.5534/wjmh.210117), 2021-12-27
Supplement: wjmh-40-270-s001.pdf [file wjmh-40-270-s001.pdf]

**Supplement Table 1.** Clinical characteristic of the study population and pathological features in prostate biopsies

| Characteristic                               | Measurement    |
|----------------------------------------------|----------------|
| Number of men                                | 567            |
| Age (y)                                      | 69 (63–74)     |
| Prostate cancer family history               | 48 (8.6)       |
| Repeat prostate biopsy                       | 134 (22.1)     |
| Serum prostate-specific antigen (ng/mL)      | 7.0 (4.9–11.5) |
| Abnormal digital rectal examination          | 109 (19.2)     |
| Multiparametric magnetic resonance imaging   | 567 (100.0)    |
| PI-RADS 1–2                                  | 100 (17.6)     |
| PI-RADS 3                                    | 169 (29.8)     |
| PI-RADS 4                                    | 190 (33.5)     |
| PI-RADS 5                                    | 108 (19.0)     |
| Prostate volume (mL)                         | 55 (40–75)     |
| Prostate cancer detection                    | 296 (52.2)     |
| Insignificant prostate cancer                | 66 (11.6)      |
| Clinically significant prostate cancer       | 232 (40.9)     |
| Biopsy grade group                           | 296 (100.0)    |
| 1                                            | 66 (22.3)      |
| 2                                            | 87 (29.4)      |
| 3                                            | 61 (20.6)      |
| 4                                            | 51 (17.2)      |
| 5                                            | 31 (10.5)      |
| Clinical TNM                                 | 296 (100.0)    |
| Localized (cT1-2 N0 M0)                      | 263 (88.9)     |
| Locally advanced (cT3-4 N0 M0)               | 22 (7.4)       |
| Disseminated (cT1-4 N0-1 M0-1)               | 11 (3.7)       |
| Localized prostate cancer risk of recurrence | 263 (100.0)    |
| Low                                          | 56 (21.3)      |
| Intermediate                                 | 136 (51.7)     |
| High                                         | 71 (27.0)      |
| Type of pathology in surgical specimen       | 80 (100.0)     |
| Favorable                                    | 8 (10.0)       |
| Unfavorable                                  | 72 (90.0)      |

Values are presented as number (%) or median (interquartile range).  
PI-RADS: Prostate Imaging-Reports and Data System.
