# Supplementary material for: The Efficacy of Proclarix to Select Appropriate Candidates for Magnetic Resonance Imaging and Derived Prostate Biopsies in Men with Suspected Prostate Cancer
Source: PubMed Central journal article supplement — World J Mens Health. 2021 Dec 27;40(2):270–9. doi: 10.5534/wjmh.210117 (PMC8987145; doi:10.5534/wjmh.210117), 2021-12-27
Supplement: wjmh-40-270-s002.pdf [file wjmh-40-270-s002.pdf]

**Supplement Table 2.** Characteristics of men with false negative results of Proclarix

| Case           | Age (y) | DRE    | Total PSA (ng/mL) | Free PSA (ng/mL) | Percent free PSA (ng/mL) | Prostate cancer family history | Biopsy type | Prostate volume (mL) | PSA density (ng/mL/cc) | PI-RADS | Group grade | Proclarix |
|----------------|---------|--------|-------------------|------------------|--------------------------|--------------------------------|-------------|----------------------|------------------------|---------|-------------|-----------|
| 1              | 69      | Normal | 6.29              | 1.69             | 26.9                     | No                             | Initial     | 50                   | 0.13                   | 5       | 2           | 9.6       |
| 2              | 50      | Normal | 7.83              | 0.56             | 7.1                      | No                             | Repeat      | 40                   | 0.20                   | 4       | 4           | 8.0       |
| 3 <sup>a</sup> | 58      | Normal | 1.87              | 0.34             | 18.1                     | No                             | Initial     | 56                   | 0.03                   | 4       | 3           | 5.7       |
| 4              | 73      | Normal | 1.56              | 0.57             | 36.2                     | No                             | Initial     | 35                   | 0.04                   | 4       | 5           | 2.3       |
| 5              | 63      | Normal | 8.14              | 2.13             | 26.2                     | No                             | Initial     | 27                   | 0.30                   | 4       | 2           | 7.9       |
| 6              | 66      | Normal | 7.60              | 2.18             | 28.7                     | No                             | Initial     | 64                   | 0.12                   | 4       | 4           | 6.6       |

DRE: digital rectal exam, PSA: prostate-specific antigen, PI-RADS: Prostate Imaging-Reporting and Data System (ver. 2.0).

<sup>a</sup>Prostate cancer suspected on magnetic resonance imaging carried out to study a rectal lesion.
