# Supplementary material for: The Efficacy of Proclarix to Select Appropriate Candidates for Magnetic Resonance Imaging and Derived Prostate Biopsies in Men with Suspected Prostate Cancer
Source: PubMed Central journal article supplement — World J Mens Health. 2021 Dec 27;40(2):270–9. doi: 10.5534/wjmh.210117 (PMC8987145; doi:10.5534/wjmh.210117), 2021-12-27
Supplement: wjmh-40-270-s003.pdf [file wjmh-40-270-s003.pdf]

**Supplement Table 3.** Characteristics of overall study population, Subset 1, and Subset 2

| Characteristic                                        | Subset 1 <sup>a</sup> | Subset 2 <sup>b</sup> | p-value |
|-------------------------------------------------------|-----------------------|-----------------------|---------|
| Number of men                                         | 281 (49.6)            | 286 (50.4)            | -       |
| Age (y)                                               | 69 (62–73)            | 71 (64–76)            | <0.001  |
| Repeat biopsy                                         | 61 (21.7)             | 72 (25.2)             | 0.383   |
| Prostate cancer family history                        | 24 (8.5)              | 29 (10.1)             | 0.913   |
| Serum prostate-specific antigen (ng/mL)               | 5.9 (4.5–7.4)         | 11.2 (5.9–16.4)       | <0.001  |
| Serum free prostate-specific antigen (ng/mL)          | 0.98 (0.69–1.38)      | 1.33 (0.69–2.51)      | <0.001  |
| Abnormal digital rectal examination                   | 0 (0.0)               | 109 (38.1)            | <0.001  |
| Prostate volume (mL)                                  | 60 (45–78)            | 49 (33–70)            | <0.001  |
| Proclarix score (%)                                   | 21.0 (9.7–34.6)       | 41.0 (24.8–70)        | <0.001  |
| Prostate cancer detection rate                        | 117 (41.6)            | 179 (62.6)            | <0.001  |
| Clinically significant prostate cancer detection rate | 72 (25.6)             | 158 (55.2)            | <0.001  |
| Insignificant prostate cancer detection rate          | 45 (16.0)             | 21 (7.3)              | <0.001  |
| PI-RADS 1–2                                           | 63 (22.4)             | 37 (12.9)             | <0.001  |
| PI-RADS 3                                             | 99 (35.2)             | 70 (24.5)             |         |
| PI-RADS 4                                             | 103 (36.7)            | 87 (30.4)             |         |
| PI-RADS 5                                             | 16 (5.7)              | 92 (32.2)             |         |

Values are presented as median (interquartile range) or number (%).

-: not available, PI-RADS: Prostate Imaging-Reporting and Data System.

<sup>a</sup>PSA 2 to 10 ng/mL, and prostate volume  $\geq$ 35 mL, and normal DRE.

<sup>b</sup>Not meet any of the previous characteristics.
